# Supplementary material for: Continuous glucose monitoring in pregnant women with type 1 diabetes (CONCEPTT): a multicentre international randomised controlled trial
Source: PubMed Central journal article supplement (PMC5713979; doi:10.1016/s0140-6736(17)32400-5), 2017-11-25

# THE LANCET

## Supplementary appendix

This appendix formed part of the original submission and has been peer reviewed. We post it as supplied by the authors.

Supplement to: Feig DS, Donovan LE, Corcoy R, et al, on behalf of the CONCEPTT Collaborative Group. Continuous glucose monitoring in pregnant women with type 1 diabetes (CONCEPTT): a multicentre international randomised controlled trial. *Lancet* 2017; published online Sept 15. [http://dx.doi.org/10.1016/S0140-6736\(17\)32400-5](http://dx.doi.org/10.1016/S0140-6736(17)32400-5).

## Table of Contents

|                                                                                                                            |    |
|----------------------------------------------------------------------------------------------------------------------------|----|
| CONCEPTT Collaborative Group (listed according to recruitment numbers):.....                                               | 2  |
| Data safety monitoring board .....                                                                                         | 2  |
| Table S1: Study visits .....                                                                                               | 3  |
| Table S2: Continuous glucose monitoring (CGM) compliance.....                                                              | 4  |
| S2a: CGM compliance of participants in pregnancy trial .....                                                               | 4  |
| S2b: Hours of CGM usage during the pregnancy trial .....                                                                   | 4  |
| S2c: CGM compliance of participants in pregnancy planning trial.....                                                       | 4  |
| S2d: Hours of CGM usage during the pregnancy planning trial .....                                                          | 4  |
| Table S3: Glycaemic outcomes of participants who conceived during the 24 week planning pregnancy trial .....               | 5  |
| Table S4: Sensitivity analyses of primary outcome .....                                                                    | 6  |
| S4a: Adjustment for potentially unbalanced maternal variables .....                                                        | 6  |
| S4b: Primary outcome results for available data and from multiple imputation .....                                         | 6  |
| S4c: Adjustment for additional contacts in the pregnant group .....                                                        | 7  |
| Table S5: Glycaemic and adverse outcomes in the planning pregnancy trial.....                                              | 8  |
| Table S6: Night-time (23.00-07.00hr) glucose measures .....                                                                | 9  |
| Table S7: Daytime (07.00-23.00hr) glucose measures .....                                                                   | 10 |
| Table S8: Continuous glucose measures in insulin pump users .....                                                          | 11 |
| Table S9: Continuous glucose measures in Multiple Daily Injection (MDI) users .....                                        | 12 |
| Table S10: CGM measures at baseline 24 and at 34 weeks in pregnancy trial.....                                             | 13 |
| Table S11: CGM measures at baseline, 12 and 24 weeks in pregnancy planning trial.....                                      | 14 |
| Table S12: Additional neonatal outcomes .....                                                                              | 15 |
| Table S13: Neonatal anthropometric measures .....                                                                          | 16 |
| Table S14: Obstetric and neonatal outcomes of pregnancy planning participants who conceived during the 24-week trial ..... | 17 |
| Table S15: Summary of the Patient Reported Outcome Measures in the Pregnancy Trial .....                                   | 18 |
| Table S16: Summary of the Patient Reported Outcome Measures in the Pregnancy Planning Trial .....                          | 19 |
| Table S17: CGM problems and skin reactions .....                                                                           | 20 |
| Table S18: Hospital admissions in pregnant women .....                                                                     | 21 |
| Table S19: Adverse Events (occurrences) .....                                                                              | 22 |
| S19a: Serious Adverse Events (occurrences).....                                                                            | 22 |
| Figure S1: Change in HbA1c in relation to unscheduled antenatal visits.....                                                | 23 |
| Figure S2: Neonatal birthweight percentiles according to country .....                                                     | 24 |
| Figure S3: Neonatal Large for Gestational Age (LGA) rates according to country .....                                       | 25 |

### **CONCEPTT Collaborative Group (listed according to recruitment numbers):**

Cambridge University Hospitals NHS Foundation Trust, Cambridge, UK: Helen Murphy, Jeannie Grisoni, Carolyn Byrne, Sandra Neoh, Katy Davenport, (43); Alberta Health Services, University of Calgary, Calgary, Canada: Lois Donovan, Claire Gougeon, Carolyn Oldford, Catherine Young (39); King's College Hospital, London, UK: Stephanie Amiel, Katharine Hunt, Louisa Green, Helen Rogers, Benedetta Rossi (29); Mount Sinai Hospital, Toronto, Canada: Denice Feig, Barbara Cleave, Michelle Strom (22); Hospital de la Santa Creu i Sant Pau, Barcelona, Spain and CIBER-BBN, Zaragoza, Spain: Rosa Corcoy, Alberto de Leiva, Juan María Adelantado, Ana Isabel Chico, Diana Tundidor (22); The Ottawa Hospital General Campus, Ottawa, Canada: Erin Keely, Janine Malcolm, Kathy Henry (15); Ipswich Hospital NHS Trust, Ipswich, UK: Damian Morris, Gerry Rayman, Duncan Fowler, Susan Mitchell, Josephine Rosier (13); Norfolk and Norwich University Hospital, Norwich, UK: Rosemary Temple, Jeremy Turner, Gioia Canciani, Niranjala Hewapathirana, Leanne Piper (13); St. Joseph's Health Centre, London, Canada: Ruth McManus, Anne Kudirka, Margaret Watson (13); Niguarda ca' Granda Hospital, Milano, Italy: Matteo Bonomo, Basilio Pintaudi, Federico Bertuzzi, Giuseppina Daniela Corica, Elena Mion (12); Sunnybrook Health Sciences Centre, Toronto, Canada: Julia Lowe, Ilana Halperin, Anna Rogowsky, Sapida Adib (11); Glasgow Royal Infirmary, Glasgow, UK: Robert Lindsay, David Carty, Isobel Crawford, Fiona Mackenzie, Therese McSorley (10); McMaster University, Hamilton, Canada: John Booth, Natalia McInnes, Ada Smith, Irene Stanton, Tracy Tazzeo (8); Centre hospitalier universitaire de Québec, Quebec City, Canada: John Weisnagel (6); Queen's Medical Centre, Nottingham, UK: Peter Mansell, Nia Jones, Gayna Babington, Dawn Spick (6); Royal Victoria Infirmary, Newcastle Upon Tyne, Newcastle, UK: Malcolm MacDougall, Sharon Chilton, Terri Cutts, Michelle Perkins (6); Leeds Teaching Hospitals NHS Trust, Leeds, UK: Eleanor Scott, Del Endersby (6); Royal Infirmary of Edinburgh, Edinburgh, UK: Anna Dover, Frances Dougherty, Susan Johnston (6); Sheffield Teaching Hospitals NHS Foundation Trust, Sheffield, UK: Simon Heller, Peter Novodorsky, Sue Hudson, Chloe Nisbet (6); Izaak Walton Killam Health Sciences Centre (IWK), Halifax, Canada: Thomas Ransom, Jill Coolen, Darlene Baxendale (5); University Hospital Southampton NHS Foundation Trust, Southampton, UK: Richard Holt, Jane Forbes, Nicki Martin, Fiona Walbridge (6); Galway University Hospitals, Galway, Ireland: Fidelma Dunne, Sharon Conway, Aoife Egan, Collette Kirwin (4); Central Manchester University Hospitals NHS Foundation Trust, Manchester, UK: Michael Maresh, Gretta Kearney, Juliet Morris, Susan Quinn (4); South Tees Hospitals, NHS Foundation Trust, Middlesbrough, UK: Rudy Bilous, Rasha Mukhtar (4); Centre de Recherche du Centre Hospitalier de Université de Montréal (CR-CHUM), Montreal, Canada: Ariane Godbout, Sylvie Daigle (3); The Dudley Group NHS FT, Russells Hall Hospital, Dudley, UK: Alexandra Lubina Solomon, Margaret Jackson, Emma Paul, Julie Taylor (3); Kingston General Hospital, Queen's University, Kingston, Canada: Robyn Houlden, Adriana Breen (3); Guys and St Thomas' NHS Foundation Trust, London, UK: Anita Banerjee, Anna Brackenridge, Annette Briley, Anna Reid, Claire Singh (2); Royal University Hospital, Saskatoon, Canada: Jill Newstead-Angel, Janet Baxter (2); Grampian Diabetes Centre, Aberdeen, UK: Sam Philip, Martyna Chlost, Lynne Murray (2); William Sansum Diabetes Center, Santa Barbara, USA: Kristin Castorino, Lois Jovanovic, Donna Frase (2). Juvenile Diabetes Research Foundation (non-clinical collaborators): Olivia Lou and Marlon Pragnell.

### **Data safety monitoring board**

Kevin Thorpe (University of Toronto, Toronto, Canada); Lelia Duley (Bradford Institute for Health Research, Bradford, UK); John Pickup (King's College London, London, UK); Michael Bracken and Richard Ehrenkranz (Yale University School of Medicine, New Haven, CT, USA).

**Table S1: Study visits**

|                                                   | Pregnant       |                |                       | Planning pregnancy <sup>†</sup> |                 |                       |
|---------------------------------------------------|----------------|----------------|-----------------------|---------------------------------|-----------------|-----------------------|
|                                                   | CGM            | Control        | P-value <sup>††</sup> | CGM                             | Control         | P-value <sup>††</sup> |
|                                                   | N=103          | N=104          |                       | N=52                            | N=57            |                       |
| Total number of scheduled visits <sup>¶</sup>     | 739            | 706            |                       | 260                             | 292             |                       |
| <b>Visits per participant*</b>                    | <b>7.2±1.1</b> | <b>6.8±1.4</b> | <b>0.0171</b>         | 5.0±1.6                         | 5.1±1.5         | 0.71                  |
| Total number of unscheduled contacts <sup>†</sup> | 1530           | 1026           |                       | 418                             | 333             |                       |
| Diabetes management                               | 857            | 858            |                       | 237                             | 265             |                       |
|                                                   | 8.3±7.9        | 8.2±7.4        | 0.92                  | 4.6±5.9                         | 4.6±5.3         | 0.47                  |
| <b>CGM issues</b>                                 | <b>213</b>     | <b>8</b>       |                       | <b>109</b>                      | <b>3</b>        |                       |
|                                                   | <b>2.1±2.8</b> | <b>0.1±0.3</b> | <b>&lt;0.0001</b>     | <b>2.1±2.5</b>                  | <b>0.05±0.3</b> | <b>&lt;0.0001</b>     |
| <b>Diabetes and CGM issues</b>                    | <b>269</b>     | <b>25</b>      |                       | <b>30</b>                       | <b>10</b>       |                       |
|                                                   | <b>2.6±5.3</b> | <b>0.2±0.7</b> | <b>&lt;0.0001</b>     | <b>0.6±1.2</b>                  | <b>0.2±0.8</b>  | <b>0.02</b>           |
| Other                                             | 191            | 135            |                       | 42                              | 55              |                       |
|                                                   | 1.8±3.5        | 1.3±2.2        | 0.31                  | 0.8±1.2                         | 1.0±1.2         | 0.62                  |

<sup>¶</sup> Participants who completed at least one study visit are included

\*Values are means ±SD

<sup>†</sup>Unscheduled contacts are shown as the total number and the mean (SD) per participant. These included face-to-face visits as well as telephone or email contacts

<sup>††</sup>P-values for continuous variables are from Wilcoxon rank-sum tests

**Table S2: Continuous glucose monitoring (CGM) compliance**

**S2a: CGM compliance of participants in pregnancy trial**

|                          | Overall    | ≤24 Weeks  | 25-34 Weeks |
|--------------------------|------------|------------|-------------|
| <b>Days per week</b>     | N=108      | N=108      | N=108       |
| Zero                     | 8 (7%)     | 8 (7%)     | 16 (15%)    |
| <1 day                   | 7 (6%)     | 6 (6%)     | 7 (6%)      |
| 1-<2 days                | 6 (6%)     | 4 (4%)     | 1 (<1%)     |
| 2-<3 days                | 2 (2%)     | 3 (3%)     | 1 (<1%)     |
| 3-<4 days                | 4 (4%)     | 6 (6%)     | 2 (2%)      |
| 4-<5 days                | 6 (6%)     | 5 (5%)     | 6 (6%)      |
| 5-<6 days                | 16 (15%)   | 21 (19%)   | 14 (13%)    |
| 6-<7 days                | 48 (44%)   | 37 (34%)   | 33 (31%)    |
| 7 days                   | 11 (10%)   | 18 (17%)   | 28 (26%)    |
| median                   | 6.1        | 6.0        | 6.5         |
| (25th, 75th percentiles) | (4.0, 6.8) | (4.0, 6.7) | (3.9, 7.0)  |
| <6 days                  | 49 (45%)   | 53 (49%)   | 47 (44%)    |
| ≥6 days                  | 59 (55%)   | 55 (51%)   | 61 (56%)    |

**S2b: Hours of CGM usage during the pregnancy trial**

|                          | Weeks <13 | Weeks 13-17 | Weeks 18-21 | Weeks 22-25 | Weeks 26-29 | Weeks 30-34 |
|--------------------------|-----------|-------------|-------------|-------------|-------------|-------------|
| <b>Pregnant</b>          | N=71*     | N=108       | N=108       | N=108       | N=108       | N=108       |
| Zero use (# of women)    | 12        | 15          | 19          | 14          | 18          | 22          |
| Median hours per week    | 133       | 123         | 124         | 131         | 130         | 129         |
| (25th, 75th percentiles) | (72, 155) | (61, 150)   | (70, 147)   | (68, 151)   | (69, 148)   | (57, 149)   |
| [range]                  | [0, 167]  | [0, 164]    | [0, 164]    | [0, 162]    | [0, 164]    | [0, 164]    |

Participants in the CGM group who discontinued the intervention or withdrew from the trial are considered as having zero use.

**S2c: CGM compliance of participants in pregnancy planning trial**

|                          | Overall    | ≤12 Weeks  | 13-24 Weeks |
|--------------------------|------------|------------|-------------|
| <b>Days per week</b>     | N=52*      | N=52       | N=43        |
| Zero                     | 1 (2%)     | 1 (2%)     | 3 (7%)      |
| <1 day                   | 0 (0%)     | 0 (0%)     | 3 (7%)      |
| 1-<2 days                | 3 (6%)     | 3 (6%)     | 1 (2%)      |
| 2-<3 days                | 1 (2%)     | 0 (0%)     | 1 (2%)      |
| 3-<4 days                | 3 (6%)     | 0 (0%)     | 1 (2%)      |
| 4-<5 days                | 4 (8%)     | 7 (13%)    | 6 (14%)     |
| 5-<6 days                | 10 (19%)   | 6 (12%)    | 5 (12%)     |
| 6-<7 days                | 19 (37%)   | 23 (44%)   | 8 (19%)     |
| 7 days                   | 11 (21%)   | 12 (23%)   | 15 (35%)    |
| median                   | 6.2        | 6.7        | 6.3         |
| (25th, 75th percentiles) | (5.2, 6.9) | (5.3, 6.9) | (4.1, 7.0)  |
| <6 days                  | 22 (42%)   | 17 (33%)   | 20 (47%)    |
| ≥6 days                  | 30 (58%)   | 35 (67%)   | 23 (53%)    |

\*53 participants were randomised but one woman conceived before randomisation. Women who become pregnant (n=17) are included up to the point they conceive.

Participants in the CGM group who discontinued the intervention or withdrew from the trial are considered as having zero use.

**S2d: Hours of CGM usage during the pregnancy planning trial**

|                          | Weeks 1-4  | Weeks 5-8  | Weeks 9-12 | Weeks 13-16 | Weeks 17-20 | Weeks 21-24 |
|--------------------------|------------|------------|------------|-------------|-------------|-------------|
| <b>Pregnant</b>          | N=52       | N=48       | N=46       | N=43        | N=40        | N=38        |
| Zero use (# of women)    | 1          | 3          | 1          | 3           | 7           | 7           |
| Median hours per week    | 139        | 138        | 135        | 129         | 123         | 118         |
| (25th, 75th percentiles) | (116, 156) | (115, 155) | (105, 150) | (93, 152)   | (66, 152)   | (74, 148)   |
| [range]                  | [0, 165]   | [0, 163]   | [0, 163]   | [0, 163]    | [0, 164]    | [0, 160]    |

**Table S3: Glycaemic outcomes of participants who conceived during the 24 week planning pregnancy trial**

|                                                          | CGM               | Control           |
|----------------------------------------------------------|-------------------|-------------------|
| HbA1c levels <sup>◇</sup>                                |                   |                   |
| At pregnancy confirmation                                | 6.91±0.45         | 7.01±0.54         |
| HbA1c at 24 weeks gestation                              | 6.24 ±0.47        | 6.49±0.69         |
| Change from pregnancy confirmation to 24 weeks gestation | -0.50±0.36        | -0.58±0.56        |
| HbA1c at 34 weeks gestation                              | 6.36±0.42         | 6.63±0.68         |
| Change from pregnancy confirmation to 34 weeks gestation | -0.39±0.32        | -0.46±0.67        |
| Achieving target HbA1c level*                            | 6 (66.7%)<br>N=14 | 7 (46.7%)<br>N=16 |
| Severe hypoglycaemia <sup>‡</sup>                        | 2 (14.3%)         | 2 (12.5%)         |
| Diabetic ketoacidosis                                    | 1 (7.1%)          | 0                 |
| Changed from pump to injections                          | 0                 | 0                 |
| Changed from injections to pump                          | 0                 | 1                 |
|                                                          | N=10              | N=15              |
| Total insulin dose at 34 weeks (Unit/kg/day)             | 1.21±0.72         | 0.93±0.31         |

<sup>◇</sup> At pregnancy confirmation, 24 and 34 weeks n=15, 9, 9 for CGM and n=16, 15, 15 control group participants for central lab HbA1c levels.

\*The target levels for HbA1c were ≤7.0% (53mmol/mol) before pregnancy and ≤6.5% (48mmol/mol) during pregnancy.

<sup>‡</sup> Severe hypoglycaemia is from randomisation to 36 weeks gestation.

**Table S4: Sensitivity analyses of primary outcome**

**S4a: Adjustment for potentially unbalanced maternal variables**

| Characteristic                              | Estimate     | 95% CI              | P-value           |
|---------------------------------------------|--------------|---------------------|-------------------|
| <b>Pregnant participants</b>                |              |                     |                   |
| <b>Baseline HbA1c (per %)</b>               | <b>0.50</b>  | <b>0.36, 0.64</b>   | <b>&lt;0.0001</b> |
| BMI (per kg/m <sup>2</sup> )                | 0.00         | -0.02, 0.02         | 0.94              |
| Post-secondary level education (vs. lower)  | 0.04         | -0.16, 0.24         | 0.68              |
| Smoking (ever vs. never)                    | 0.03         | -0.20, 0.27         | 0.77              |
| Duration of diabetes (years)                | 0.01         | -0.01, 0.02         | 0.33              |
| Severe hypoglycaemia (vs. not)              | -0.11        | -0.43, 0.20         | 0.48              |
| <b>Multiple daily injections (vs. pump)</b> | <b>-0.22</b> | <b>-0.39, -0.04</b> | <b>0.0145</b>     |
| <b>CGM (vs control)</b>                     | <b>-0.18</b> | <b>-0.35, -0.01</b> | <b>0.0382</b>     |
| <b>Pregnancy planning participants</b>      |              |                     |                   |
| <b>Baseline HbA1c (per %)</b>               | <b>0.67</b>  | <b>0.47, 0.86</b>   | <b>&lt;0.0001</b> |
| BMI (per kg/m <sup>2</sup> )                | 0.01         | -0.02, 0.04         | 0.51              |
| Post-secondary level education (vs. lower)  | 0.20         | -0.17, 0.56         | 0.29              |
| <b>Smoking (ever vs. never)</b>             | <b>0.47</b>  | <b>0.02, 0.93</b>   | <b>0.0415</b>     |
| Duration of diabetes (years)                | 0.01         | -0.01, 0.02         | 0.40              |
| <b>Severe hypoglycaemia (vs. not)</b>       | <b>0.56</b>  | <b>0.12, 1.01</b>   | <b>0.0134</b>     |
| Multiple daily injections (vs. pump)        | 0.10         | -0.21, 0.40         | 0.53              |
| CGM (vs control)                            | -0.13        | -0.39, 0.12         | 0.31              |

Table S4a shows estimates, 95% confidence intervals and p-values from linear regression models fitted to the available data in each group. Final HbA1c (%) is the outcome; in addition to the study intervention, baseline HbA1c and insulin delivery system, variables were included in both models if there was any concern about random imbalance in these variables after inspection of their distributions across treatment arms.

**S4b: Primary outcome results for available data and from multiple imputation**

|                                      | Pregnant                     |                              | Planning Pregnancy         |                            |
|--------------------------------------|------------------------------|------------------------------|----------------------------|----------------------------|
|                                      | Estimate (95% CI; p-value)   |                              | Estimate (95% CI; p-value) |                            |
|                                      | Available data               | Multiple Imputation          | Available data             | Multiple Imputation        |
| Intercept                            | 6.66 (6.51, 6.81; <0.0001)   | 6.63 (6.49, 6.77; <0.0001)   | 7.31 (7.11, 7.50; <0.0001) | 7.29 (7.09, 7.48; <0.0001) |
| Baseline HbA1c (centred at mean)     | 0.51 (0.37, 0.65; <0.0001)   | 0.50 (0.38, 0.63; <0.0001)   | 0.64 (0.45, 0.84; <0.0001) | 0.64 (0.45, 0.84; <0.0001) |
| Multiple daily injections (vs. pump) | -0.23 (-0.4, -0.06; 0.007)   | -0.17 (-0.33, -0.01; 0.0401) | 0.13 (-0.18, 0.43; 0.42)   | 0.19 (-0.11, 0.49; 0.20)   |
| CGM (vs control)                     | -0.18 (-0.34, -0.01; 0.0372) | -0.19 (-0.34, -0.03; 0.0207) | -0.18 (-0.45, 0.08; 0.17)  | -0.17 (-0.43, 0.09; 0.20)  |

Table S4b shows the estimates, CIs and p-values from fitting the ANCOVA model to available data (no missing baseline or final HbA1c) and from pooling the ANCOVA results across 40 datasets with missing outcomes imputed using the mice procedure in R (with all HbA1c values, age at entry, insulin delivery system and treatment assignment in the imputation scheme).

**S4c: Adjustment for additional contacts in the pregnant group**

| Characteristic                              | Estimate     | 95% CI              | P-value           |
|---------------------------------------------|--------------|---------------------|-------------------|
| <b>Baseline HbA1c (per %)</b>               | <b>0.51</b>  | <b>0.37, 0.65</b>   | <b>&lt;0.0001</b> |
| <b>Multiple daily injections (vs. pump)</b> | <b>-0.23</b> | <b>-0.40, -0.06</b> | <b>0.0078</b>     |
| Number of non-CGM visits (/10 visits)       | -0.01        | -0.09, 0.08         | 0.8953            |
| <b>CGM (vs control)</b>                     | <b>-0.17</b> | <b>-0.34, -0.01</b> | <b>0.0427</b>     |

Table S4c shows estimates from the linear regression model for the primary outcome in the pregnant group, with CGM vs. control as the comparison of interest, and baseline HbA1c, insulin delivery system and the number of non-purely-CGM-related unscheduled contacts as covariates. The adjustment for post-randomisation differences in participant contacts is an exploratory post-hoc analysis and should be read with caution.



**Table S5: Glycaemic and adverse outcomes in the planning pregnancy trial**

| Planning pregnancy participants                      |                         |                         |                         |                         |                  |
|------------------------------------------------------|-------------------------|-------------------------|-------------------------|-------------------------|------------------|
|                                                      | Baseline                |                         | Follow-up <sup>†</sup>  |                         |                  |
|                                                      | CGM                     | Control                 | CGM                     | Control                 | P-value          |
| <b>HbA1c measures</b>                                | N=46                    | N=52                    | N=42                    | N=46                    |                  |
| Baseline to 12 weeks                                 | 7.57±0.77               | 7.57±0.58               | 7.30±0.70               | 7.34±0.61               |                  |
| Change to 12 weeks                                   |                         |                         | -0.35±0.72              | -0.22±0.39              | 0.44             |
| Baseline to 24 weeks                                 | 7.57±0.77               | 7.57±0.58               | 7.12±0.64               | 7.35±0.87               |                  |
| Change to 24 weeks                                   |                         |                         | -0.41±0.72              | -0.23±0.65              | 0.17             |
| Achieved HbA1c ≤7.0% (53mmol/mol) at 24 weeks        |                         |                         | 25 (52.1%)              | 21 (40.4%)              | 0.44             |
| <b>Direct CGM measures<sup>‡</sup></b>               | N=53                    | N=57                    | N=39                    | N=52                    |                  |
| Hours per week                                       | 166 (149-172)           | 157 (142-166)           | 159 (142-168)           | 152 (139-165)           |                  |
| Mean glucose ± SD                                    | 8.8±1.3                 | 9.0±1.5                 | 8.0±1.3                 | 8.6±1.6                 | 0.14             |
| % Time in target                                     | 42±13                   | 41±13                   | 48±13                   | 43±16                   | 0.30             |
| % Time > 7.8mmol/l                                   | 54 (45-62)              | 57 (44-65)              | 49 (40-57)              | 52 (39-65)              | 0.23             |
| High BG index                                        | 7.5 (4.8-9.7)           | 7.0 (4.8-10.2)          | 5.9 (3.3-7.2)           | 6.7 (3.9-8.7)           | 0.18             |
| % Time < 3.5mmol/l                                   | 3 (1-7)                 | 2 (0-4)                 | 4 (1-8)                 | 3 (1-6)                 | 0.15             |
| Low BG index                                         | 1.3 (0.7-2.5)           | 1.0 (0.4-1.7)           | 1.8 (0.9-2.5)           | 1.3 (0.7-2.2)           | 0.41             |
| Hypoglycaemia event <sup>¥</sup>                     | 0.5 (0.1-0.7)           | 0.3 (0.1-0.6)           | 0.6 (0.2-0.8)           | 0.5 (0.1-0.7)           | 0.34             |
| Glucose variability measures                         |                         |                         |                         |                         |                  |
| CV %                                                 | 40 (36-45)              | 38 (33-45)              | 40 (35-44)              | 37 (33-42)              | 0.40             |
| SD mmol/L                                            | 3.5 (3.0-4.4)           | 3.5 (2.7-4.1)           | 3.3 (2.5-3.7)           | 3.2 (2.7-3.7)           | 0.54             |
| MAGE mmol/L                                          | 6.6 (5.7-7.9)           | 6.5 (5.6-7.9)           | 6.4 (4.8-7.5)           | 6.7 (5.6-7.4)           | 0.53             |
| <b>Rate of change mmol/l/hour</b>                    | <b>2.18 (1.86-2.62)</b> | <b>2.14 (1.79-2.43)</b> | <b>2.82 (2.24-3.25)</b> | <b>2.13 (1.77-2.45)</b> | <b>&lt;0.001</b> |
| <b>Other secondary outcomes</b>                      | N=53                    | N=57                    | N=52                    | N=57                    |                  |
| Severe Hypoglycaemia*                                |                         |                         |                         |                         |                  |
| Number of women                                      | 3 (5.7%)                | 7 (12.3%)               | 7 (13.5%)               | 5 (8.8%)                | 0.54             |
| Number of episodes                                   | 7                       | 11                      | 12                      | 6                       |                  |
| Diabetic ketoacidosis                                | N/A                     | N/A                     | 0                       | 2 (3.5%)                | 0.50             |
| Changed to insulin pump                              |                         |                         | 0                       | 2                       | 0.50             |
| Changed from injections to insulin pump <sup>#</sup> |                         |                         | 0                       | 2                       | 0.50             |
| Total insulin dose (U/kg/day)                        | 0.61±0.19               | 0.61±0.16               | 0.61±0.17               | 0.65±0.16               | 0.31             |
| <b>Adverse events</b>                                |                         |                         | N=53                    | N=57                    |                  |
| Number of women                                      | N/A                     | N/A                     | 12 (22.6%)              | 21 (36.8%)              |                  |
| <sup>†</sup> Odds RatioCI <sub>95%</sub>             |                         |                         | 0.5 (0.2-1.1)           |                         | 0.10             |
| Number of events                                     |                         |                         | 24                      | 47                      |                  |
| <sup>†</sup> RateRatioCI <sub>95%</sub>              |                         |                         | <b>0.6 (0.3-0.9)</b>    |                         | <b>0.03</b>      |
| Number of women with serious adverse events          |                         |                         | 2 (3.8%)                | 1 (1.8%)                |                  |
| <sup>†</sup> Odds RatioCI <sub>95%</sub>             |                         |                         | 2.1 (0.2-23.9)          |                         | 0.55             |
| Number of serious adverse events                     |                         |                         | 2                       | 1                       |                  |
| <sup>†</sup> RateRatioCI <sub>95%</sub>              |                         |                         | 2.2 (0.2-25.3)          |                         | 0.51             |

Values are means ±SD and median (interquartile range) as appropriate

<sup>‡</sup>Continuous glucose measures were obtained after completion of the follow up visits using real-time sensors in the CGM group and masked sensors in the control group

<sup>¥</sup>Hypoglycaemia events are defined as continuous glucose levels <3.5mmol/L for at least 20 minutes. Distinct events were counted only if separated by at least 30 minutes.

\*Severe hypoglycaemia was defined as an episode requiring third party assistance. Prior to randomisation there were 7 episodes in 3 CGM women and 11 episodes in 7 control group women. After randomisation there were 12 further episodes in 7 CGM women and 6 episodes in 5 control group women

<sup>†</sup>All randomised participants are included. Logistic regression analyses were used to estimate the odds of occurrence of an adverse event with 95% CIs by intervention versus control group. Poisson regression was used to calculate the rate of occurrence 95% CIs over the study period (randomisation until 24 weeks). P-values are from these models, with baseline HbA1c group and method of insulin delivery as covariates. The Serious Adverse Events were gastrointestinal (nausea and vomiting) in women planning pregnancy (n=3).

<sup>#</sup>One participant planning pregnancy in the control group changed from insulin pump to multiple doses injection and back to insulin pump.

**Table S6: Night-time (23.00-07.00hr) glucose measures**

| <b>Pregnant participants</b> |                 |                |                   |                |
|------------------------------|-----------------|----------------|-------------------|----------------|
|                              | <b>Baseline</b> |                | <b>Follow-up†</b> |                |
|                              | <b>CGM</b>      | <b>Control</b> | <b>CGM</b>        | <b>Control</b> |
|                              | <b>N=107</b>    | <b>N=107</b>   | <b>N=77</b>       | <b>N=77</b>    |
| Mean glucose mmol/l          | 6.9±1.5         | 7.2±1.4        | 6.3±0.9           | 6.4±1.2        |
| % Time in target             | 51±16           | 53±16          | 72±15             | 65±17          |
| % Time > 7.8mmol/l           | 31 (20-48)      | 37 (22-49)     | 19 (10-32)        | 24 (11-35)     |
| % Time < 3.5mmol/l           | 9 (3-23)        | 9 (4-15)       | 3 (1-9)           | 7 (1-15)       |
| Hypoglycaemia episodes‡      | 1.3 (0.5-1.8)   | 1.0 (0.5-1.6)  | 0.6 (0.4-1.2)     | 0.8 (0.4-1.3)  |
| CV %                         | 40 (33-47)      | 42 (36-49)     | 28 (26-36)        | 32 (26-39)     |
| SD mmol/L                    | 2.6 (2.1-3.4)   | 3.0 (2.3-3.9)  | 1.8 (1.5-2.3)     | 2.1 (1.6-2.5)  |
| MAGE mmol/L                  | 3.9 (2.8-4.8)   | 4.6 (3.5-5.7)  | 2.8 (2.4-3.5)     | 3.2 (2.5-4.0)  |

  

| <b>Pregnancy planning participants</b> |                 |                |                   |                |
|----------------------------------------|-----------------|----------------|-------------------|----------------|
|                                        | <b>Baseline</b> |                | <b>Follow-up†</b> |                |
|                                        | <b>CGM</b>      | <b>Control</b> | <b>CGM</b>        | <b>Control</b> |
|                                        | <b>N=53</b>     | <b>N=57</b>    | <b>N=39</b>       | <b>N=52</b>    |
| Mean glucose mmol/l                    | 8.7±1.9         | 8.9±2.1        | 7.8±1.6           | 8.4±2.0        |
| % Time in target                       | 41±17           | 41±17          | 49±19             | 45±21          |
| % Time > 7.8mmol/l                     | 50 (40-66)      | 54 (38-68)     | 41 (32-59)        | 50 (35-64)     |
| % Time < 3.5mmol/l                     | 3 (0-8)         | 1 (0-8)        | 6 (1-9)           | 3 (0-8)        |
| Hypoglycaemia episodes‡                | 0.4 (0.0-1.0)   | 0.4 (0.0-0.9)  | 0.5 (0.0-1.0)     | 0.4 (0.0-0.9)  |
| CV %                                   | 41 (32-47)      | 38 (30-45)     | 39 (35-42)        | 36 (29-41)     |
| SD mmol/L                              | 3.6 (2.8-4.2)   | 3.3 (2.5-4.2)  | 3.1 (2.3-3.6)     | 3.0 (2.4-3.6)  |
| MAGE mmol/L                            | 4.6 (3.4-5.5)   | 4.0 (3.2-5.5)  | 4.4 (3.3-5.8)     | 4.3 (3.1-5.6)  |

\*Plus-minus values are means ±SD

‡ Continuous glucose measures were obtained after completion of the baseline and follow up visits using real-time sensor in the CGM and an IPro2 masked sensor in the control group

† At follow-up (34 weeks gestation during pregnancy and 24 weeks pregnancy planning) CGM data were available for 77 pregnant and 39 participants planning pregnancy

‡ Hypoglycaemia episodes are defined as continuous glucose levels <3.5mmol/L for at least 20 minutes. Distinct episodes were counted only if separated by at least 30 minutes.

**Table S7: Daytime (07.00-23.00hr) glucose measures**

| <b>Pregnant participants</b> |                 |                |                   |                |
|------------------------------|-----------------|----------------|-------------------|----------------|
|                              | <b>Baseline</b> |                | <b>Follow-up†</b> |                |
|                              | <b>CGM</b>      | <b>Control</b> | <b>CGM</b>        | <b>Control</b> |
|                              | <b>N=107</b>    | <b>N=107</b>   | <b>N=77</b>       | <b>N=77</b>    |
| Mean glucose mmol/l          | 7.6±1.3         | 7.7±1.2        | 6.9±1.0           | 7.3±1.3        |
| % Time in target             | 52±14           | 51±15          | 65±14             | 59±16          |
| % Time > 7.8mmol/l           | 41 (29-52)      | 41 (32-54)     | 29 (20-39)        | 36 (28-45)     |
| % Time < 3.5mmol/l           | 6 (3-11)        | 4 (1-8)        | 2 (1-5)           | 3 (1-5)        |
| Hypoglycaemia episodes‡      | 1.0 (0.6-1.4)   | 0.8 (0.3-1.3)  | 0.5 (0.2-1.0)     | 0.5 (0.3-0.9)  |
| CV %                         | 42 (37-46)      | 39 (34-45)     | 31 (28-35)        | 33 (29-37)     |
| SD mmol/L                    | 3.0 (2.6-3.6)   | 3.1 (2.5-3.7)  | 2.2 (1.8-2.5)     | 2.3 (2.0-3.0)  |
| MAGE mmol/L                  | 5.8 (4.9-7.0)   | 6.1 (5.3-7.5)  | 4.1 (3.4-4.8)     | 4.5 (3.9-5.8)  |

  

| <b>Pregnancy planning participants</b> |                 |                |                   |                |
|----------------------------------------|-----------------|----------------|-------------------|----------------|
|                                        | <b>Baseline</b> |                | <b>Follow-up†</b> |                |
|                                        | <b>CGM</b>      | <b>Control</b> | <b>CGM</b>        | <b>Control</b> |
|                                        | <b>N=53</b>     | <b>N=57</b>    | <b>N=39</b>       | <b>N=52</b>    |
| Mean glucose mmol/l                    | 8.9±1.4         | 9.0±1.4        | 8.1±1.3           | 8.7±1.7        |
| % Time in target                       | 42±14           | 40±13          | 47±14             | 43±16          |
| % Time > 7.8mmol/l                     | 55 (47-60)      | 56 (47-65)     | 53 (39-59)        | 49 (42-68)     |
| % Time < 3.5mmol/l                     | 2 (0-5)         | 1 (0-4)        | 2 (1-7)           | 2 (0-5)        |
| Hypoglycaemia episodes‡                | 0.4 (0.2-0.8)   | 0.4 (0.0-0.7)  | 0.6 (0.2-1.0)     | 0.5 (0.0-0.9)  |
| CV %                                   | 38 (35-45)      | 37 (34-43)     | 37 (34-43)        | 36 (32-41)     |
| SD mmol/L                              | 3.5 (2.9-4.0)   | 3.5 (2.8-4.0)  | 3.1 (2.5-3.6)     | 3.1 (2.7-3.7)  |
| MAGE mmol/L                            | 6.5 (5.4-7.3)   | 6.4 (5.3-7.8)  | 6.0 (4.7-7.0)     | 6.4 (5.8-7.1)  |

‡ Hypoglycaemia episodes are defined as continuous glucose levels <3.5mmol/L for at least 20 minutes. Distinct episodes were counted only if separated by at least 30 minutes.

† At follow-up (34 weeks gestation during pregnancy and 24 weeks pregnancy planning)

**Table S8: Continuous glucose measures in insulin pump users**

| <b>Pregnant participants (N=98)</b> |                 |                |                   |                |
|-------------------------------------|-----------------|----------------|-------------------|----------------|
|                                     | <b>Baseline</b> |                | <b>Follow-up†</b> |                |
|                                     | <b>CGM</b>      | <b>Control</b> | <b>CGM</b>        | <b>Control</b> |
|                                     | <b>N=50</b>     | <b>N=48</b>    | <b>N=35</b>       | <b>N=37</b>    |
| Mean glucose mmol/l                 | 7.3±1.2         | 7.4±1.2        | 6.7±1.0           | 7.0±0.9        |
| % Time in target                    | 53±12           | 54±14          | 66±13             | 62±14          |
| % Time > 7.8mmol/l                  | 39 (26-47)      | 39 (29-49)     | 27 (20-37)        | 32 (27-41)     |
| % Time < 3.5mmol/l                  | 8 (3-13)        | 6 (3-10)       | 3 (1-7)           | 4 (2-7)        |
| Hypoglycaemia episodes‡             | 0.8 (0.6-1.0)   | 0.7 (0.5-0.9)  | 0.5 (0.3-0.8)     | 0.5 (0.4-0.7)  |
| CV %                                | 42 (37-47)      | 40 (36-46)     | 31 (28-37)        | 35 (29-40)     |
| SD mmol/L                           | 3.0 (2.5-3.4)   | 3.1 (2.5-3.6)  | 2.2 (1.8-2.5)     | 2.4 (2.0-3.0)  |
| MAGE mmol/L                         | 5.9 (5.0-7.0)   | 6.2 (5.4-7.5)  | 4.4 (3.5-4.8)     | 4.8 (3.9-6.1)  |

  

| <b>Pregnancy planning participants (N=81)</b> |                 |                |                   |                |
|-----------------------------------------------|-----------------|----------------|-------------------|----------------|
|                                               | <b>Baseline</b> |                | <b>Follow-up†</b> |                |
|                                               | <b>CGM</b>      | <b>Control</b> | <b>CGM</b>        | <b>Control</b> |
|                                               | <b>N=39</b>     | <b>N=42</b>    | <b>N=29</b>       | <b>N=38</b>    |
| Mean glucose mmol/l                           | 8.8±1.3         | 8.9±1.4        | 8.0±1.1           | 8.5±1.4        |
| % Time in target                              | 42±14           | 40±13          | 49±13             | 45±15          |
| % Time > 7.8mmol/l                            | 53 (45-63)      | 57 (50-65)     | 49 (40-55)        | 50 (38-67)     |
| % Time < 3.5mmol/l                            | 3 (0-7)         | 2 (0-4)        | 4 (2-8)           | 2 (0-5)        |
| Hypoglycaemia episodes‡                       | 0.5 (0.1-0.7)   | 0.3 (0.1-0.5)  | 0.6 (0.3-0.8)     | 0.4 (0.1-0.6)  |
| CV %                                          | 40 (36-48)      | 38 (32-42)     | 41 (36-44)        | 35 (33-40)     |
| SD mmol/L                                     | 3.4 (2.9-4.5)   | 3.3 (2.6-4.0)  | 3.3 (2.5-3.7)     | 3.0 (2.6-3.5)  |
| MAGE mmol/L                                   | 6.3 (5.6-8.2)   | 6.4 (5.4-7.8)  | 6.4 (4.8-7.4)     | 6.5 (5.2-7.1)  |

‡Hypoglycaemia episodes are defined as continuous glucose levels <3.5mmol/L for at least 20 minutes. Distinct episodes were counted only if separated by at least 30 minutes.

†At follow-up (34 weeks gestation during pregnancy and 24 weeks pregnancy planning)

**Table S9: Continuous glucose measures in Multiple Daily Injection (MDI) users**

| <b>Pregnant participants (N=116)</b> |                 |                |                   |                |
|--------------------------------------|-----------------|----------------|-------------------|----------------|
|                                      | <b>Baseline</b> |                | <b>Follow-up†</b> |                |
|                                      | <b>CGM</b>      | <b>Control</b> | <b>CGM</b>        | <b>Control</b> |
|                                      | <b>N=57</b>     | <b>N=59</b>    | <b>N=42</b>       | <b>N=40</b>    |
| Mean glucose mmol/l                  | 7.3±1.2         | 7.7±1.0        | 6.7±0.8           | 7.0±1.3        |
| % Time in target                     | 50±13           | 50±13          | 69±13             | 61±17          |
| % Time > 7.8mmol/l                   | 39 (30-49)      | 41 (34-51)     | 26 (17-36)        | 31 (24-39)     |
| % Time < 3.5mmol/l                   | 8 (5-17)        | 6 (2-12)       | 3 (1-6)           | 5 (2-9)        |
| Hypoglycaemia episodes‡              | 0.8 (0.6-1.0)   | 0.7 (0.3-0.9)  | 0.5 (0.3-0.8)     | 0.5 (0.3-0.8)  |
| CV %                                 | 43 (39-48)      | 43 (36-49)     | 33 (28-37)        | 34 (29-38)     |
| SD mmol/L                            | 3.2 (2.7-3.6)   | 3.2 (2.7-3.9)  | 2.2 (1.8-2.5)     | 2.3 (2.0-2.8)  |
| MAGE mmol/L                          | 6.3 (5.2-7.1)   | 6.6 (5.5-8.2)  | 4.2 (3.6-5.3)     | 4.6 (3.9-5.7)  |

  

| <b>Pregnancy planning participants (N=29)</b> |                 |                |                   |                |
|-----------------------------------------------|-----------------|----------------|-------------------|----------------|
|                                               | <b>Baseline</b> |                | <b>Follow-up†</b> |                |
|                                               | <b>CGM</b>      | <b>Control</b> | <b>CGM</b>        | <b>Control</b> |
|                                               | <b>N=14</b>     | <b>N=15</b>    | <b>N=10</b>       | <b>N=14</b>    |
| Mean glucose mmol/l                           | 8.9±1.3         | 9.1±1.6        | 8.1±1.8           | 8.9±2.1        |
| % Time in target                              | 39±12           | 42±14          | 44±15             | 40±17          |
| % Time > 7.8mmol/l                            | 55 (49-62)      | 56 (41-66)     | 54 (43-62)        | 54 (46-61)     |
| % Time < 3.5mmol/l                            | 2 (1-8)         | 3 (0-7)        | 3 (1-7)           | 6 (3-9)        |
| Hypoglycaemia episodes‡                       | 0.5 (0.1-0.8)   | 0.4 (0.0-0.7)  | 0.5 (0.2-0.7)     | 0.6 (0.5-0.7)  |
| CV %                                          | 39 (35-45)      | 41 (36-48)     | 36 (35-42)        | 41 (38-46)     |
| SD mmol/L                                     | 3.7 (3.0-3.8)   | 4.0 (3.2-4.1)  | 3.1 (2.6-3.4)     | 3.6 (3.2-4.5)  |
| MAGE mmol/L                                   | 7.1 (5.7-7.7)   | 7.0 (6.0-9.4)  | 6.4 (5.7-7.5)     | 7.4 (5.9-8.2)  |

‡ Hypoglycaemic episodes are defined as continuous glucose levels <3.5mmol/L for at least 20 minutes. Distinct episodes were counted only if separated by at least 30 minutes

†At follow-up (34 weeks gestation during pregnancy and 24 weeks pregnancy planning)

**Table S10: CGM measures at baseline 24 and at 34 weeks in pregnancy trial**

| Pregnant participants         |                   |                   |                          |                          |                   |                          |                          |                      |
|-------------------------------|-------------------|-------------------|--------------------------|--------------------------|-------------------|--------------------------|--------------------------|----------------------|
|                               | Baseline          |                   | Week 24                  |                          |                   | Week 34                  |                          |                      |
|                               | CGM               | Control           | CGM                      | Control                  | P-value           | CGM                      | Control                  | P-value <sup>†</sup> |
|                               | N=107             | N=107             | N=90                     | N=90                     |                   | N=77                     | N=77                     |                      |
| <i>Hours of CGM Data</i>      | 158 (143, 168)    | 150 (139, 165)    | 168 (147, 182)           | 160 (144, 165)           | -                 | 159 (143, 177)           | 156 (143, 166)           | -                    |
| <i>Glucose Control</i>        |                   |                   |                          |                          |                   |                          |                          |                      |
| Mean (mmol/L)                 | 7.3 ± 1.2         | 7.6 ± 1.1         | 7.6 ± 1.2                | 7.8 ± 1.3                | 0.53              | 6.7 ± 0.9                | 7.0 ± 1.1                | 0.14                 |
| % CGM 3.5-7.8 mmol/L          | 52% ± 13%         | 52% ± 14%         | 53% ± 15%                | 50% ± 15%                | 0.14              | <b>68% ± 13%</b>         | <b>61% ± 15%</b>         | <b>0.0034</b>        |
| <i>Hyperglycaemia</i>         |                   |                   |                          |                          |                   |                          |                          |                      |
| % CGM >7.8 mmol/L             | 39% (28%, 49%)    | 40% (32%, 51%)    | 43% (29%, 54%)           | 45% (33%, 54%)           | 0.76              | <b>27% (19, 37%)</b>     | <b>32% (25, 39%)</b>     | <b>0.0279</b>        |
| AUC >7.8 mmol/L               | 20 (11, 29)       | 22 (13, 32)       | 17 (10, 30)              | 21 (11, 28)              | 0.47              | 8 (4, 13)                | 10 (7, 16)               | 0.087                |
| % CGM >6.7 mmol/L             | 51% (40%, 61%)    | 53% (46%, 63%)    | 58% (44%, 70%)           | 60% (49%, 69%)           | 0.51              | 45% (34%, 57%)           | 48% (42%, 55%)           | 0.14                 |
| AUC >6.7 mmol/L               | 30 (18, 39)       | 31 (21, 44)       | 27 (17, 42)              | 31 (20, 40)              | 0.46              | <b>15 (9, 21)</b>        | <b>18 (13, 26)</b>       | <b>0.0489</b>        |
| High BG index                 | 4.2 (2.3, 6.2)    | 4.6 (2.8, 6.7)    | 3.6 (2.2, 6.3)           | 4.4 (2.5, 5.9)           | 0.44              | 1.8 (1.1, 2.8)           | 2.3 (1.5, 3.4)           | 0.067                |
| <i>Hypoglycaemia</i>          |                   |                   |                          |                          |                   |                          |                          |                      |
| % CGM <3.5 mmol/L             | 8% (4%, 14%)      | 6% (3%, 11%)      | 3% (1%, 6%)              | 4% (1%, 8%)              | 0.42              | 3% (1%, 6%)              | 4% (2%, 8%)              | 0.10                 |
| AUC <3.5 mmol/L               | 0.8 (0.3, 1.7)    | 0.5 (0.2, 1.3)    | 0.3 (0.1, 0.6)           | 0.4 (0.1, 0.8)           | 0.38              | 0.2 (0.1, 0.6)           | 0.2 (0.1, 0.9)           | 0.17                 |
| % CGM <2.8 mmol/L             | 2% (0%, 6%)       | 1% (0%, 4%)       | 0% (0%, 2%)              | 1% (0%, 3%)              | 0.32              | 0% (0%, 2%)              | 1% (0%, 3%)              | 0.44                 |
| AUC <2.8 mmol/L               | 0.1 (0.0, 0.4)    | 0.1 (0.0, 0.3)    | 0.0 (0.0, 0.1)           | 0.0 (0.0, 0.2)           | 0.45              | 0.0 (0.0, 0.1)           | 0.0 (0.0, 0.2)           | 0.57                 |
| Low BG index                  | 2.8 (1.6, 4.6)    | 2.4 (1.5, 3.6)    | 1.5 (0.9, 2.4)           | 1.7 (0.9, 2.7)           | 0.42              | 1.7 (1.1, 2.8)           | 2.1 (1.4, 2.8)           | 0.18                 |
| Episodes per 24h <sup>a</sup> | 0.8 (0.6, 1.0)    | 0.7 (0.4, 0.9)    | 0.5 (0.3, 0.8)           | 0.5 (0.3, 0.8)           | 0.96              | 0.5 (0.3, 0.8)           | 0.5 (0.3, 0.8)           | 0.73                 |
| <i>Glucose variability</i>    |                   |                   |                          |                          |                   |                          |                          |                      |
| CV                            | 42% (38%, 47%)    | 42% (36%, 47%)    | 35% (31%, 39%)           | 36% (32%, 41%)           | 0.27              | 32% (28%, 37%)           | 34% (29%, 39%)           | 0.058                |
| SD (mmol/L)                   | 3.1 (2.6, 3.6)    | 3.1 (2.6, 3.8)    | 2.6 (2.3, 3.1)           | 2.8 (2.3, 3.3)           | 0.24              | <b>2.2 (1.8, 2.5)</b>    | <b>2.4 (2.0, 2.8)</b>    | <b>0.0359</b>        |
| MAGE (mmol/L)                 | 6.0 (5.1, 7.1)    | 6.4 (5.5, 7.8)    | 5.5 (4.6, 6.2)           | 5.9 (4.6, 6.7)           | 0.23              | <b>4.2 (3.5, 4.9)</b>    | <b>4.6 (3.9, 6.0)</b>    | <b>0.0455</b>        |
| Absolute rate of change       | 0.65 (0.56, 0.76) | 0.65 (0.57, 0.74) | <b>0.67 (0.58, 0.77)</b> | <b>0.55 (0.48, 0.66)</b> | <b>&lt;0.0001</b> | <b>0.61 (0.51, 0.68)</b> | <b>0.49 (0.39, 0.59)</b> | <b>&lt;0.0001</b>    |

<sup>‡</sup>Hypoglycaemic episode defined as CGM readings <3.5 mmol/L for at least 20 minutes. Distinct episodes must be separated by at least 30 minutes.

<sup>†</sup>P-value at 24 and 34 weeks adjusted for baseline value and insulin modality.

**Table S11: CGM measures at baseline, 12 and 24 weeks in pregnancy planning trial**

| Pregnancy planning participants |                   |                   |                   |                   |                      |                        |                   |                      |
|---------------------------------|-------------------|-------------------|-------------------|-------------------|----------------------|------------------------|-------------------|----------------------|
|                                 | Baseline          |                   | Week 12           |                   |                      | Follow-up <sup>†</sup> |                   |                      |
|                                 | CGM               | Control           | CGM               | Control           | P-value <sup>†</sup> | CGM                    | Control           | P-value <sup>†</sup> |
|                                 | N=53              | N=57              | N=39 <sup>a</sup> | N=46 <sup>a</sup> |                      | N=39 <sup>b</sup>      | N=52 <sup>b</sup> |                      |
| <b>Hours of CGM Data</b>        | 166 (149, 172)    | 157 (142, 166)    | 160 (133, 174)    | 157 (141, 165)    | -                    | 159 (142, 168)         | 152 (139, 165)    |                      |
| <b>Glucose Control</b>          |                   |                   |                   |                   |                      |                        |                   |                      |
| Mean (mmol/L)                   | 8.8 ± 1.3         | 9.0 ± 1.5         | 8.4 ± 1.4         | 9.0 ± 1.6         | 0.03                 | 8.0 ± 1.3              | 8.6 ± 1.6         | 0.14                 |
| % CGM 3.5-7.8 mmol/L            | 42% ± 13%         | 41% ± 13%         | 43% ± 14%         | 40% ± 14%         | 0.16                 | 48% ± 13%              | 43% ± 16%         | 0.30                 |
| <b>Hyperglycaemia</b>           |                   |                   |                   |                   |                      |                        |                   |                      |
| % CGM >7.8 mmol/L               | 54% (45%, 62%)    | 57% (44%, 65%)    | 55% (36%, 63%)    | 57% (47%, 65%)    | 0.17                 | 49% (40%, 57%)         | 52% (39%, 65%)    | 0.23                 |
| AUC >7.8 mmol/L                 | 36 (23, 47)       | 33 (23, 48)       | 31 (17, 40)       | 36 (25, 49)       | 0.006                | 28 (15, 34)            | 32 (18, 41)       | 0.20                 |
| % CGM >6.7 mmol/L               | 67% (56%, 75%)    | 69% (62%, 79%)    | 66% (53%, 73%)    | 69% (59%, 77%)    | 0.34                 | 62% (51%, 71%)         | 65% (54%, 78%)    | 0.28                 |
| AUC >6.7 mmol/L                 | 49 (33, 61)       | 46 (33, 61)       | 42 (24, 54)       | 49 (36, 64)       | 0.007                | 39 (25, 48)            | 42 (28, 56)       | 0.20                 |
| High BG index                   | 7.5 (4.8, 9.7)    | 7.0 (4.8, 10.2)   | 6.5 (3.6, 8.5)    | 7.5 (5.3, 10.4)   | 0.005                | 5.9 (3.3, 7.2)         | 6.7 (3.9, 8.7)    | 0.18                 |
| <b>Hypoglycaemia</b>            |                   |                   |                   |                   |                      |                        |                   |                      |
| % CGM <3.5 mmol/L               | 3% (1%, 7%)       | 2% (0%, 4%)       | 4% (1%, 7%)       | 3% (1%, 7%)       | 0.82                 | 4% (1%, 8%)            | 3% (1%, 6%)       | 0.15                 |
| AUC <3.5 mmol/L                 | 0.2 (0.0, 0.8)    | 0.2 (0.0, 0.4)    | 0.3 (0.0, 0.8)    | 0.2 (0.0, 1.0)    | 0.93                 | 0.3 (0.1, 0.8)         | 0.2 (0.0, 0.6)    | 0.27                 |
| % CGM <2.8 mmol/L               | 1% (0%, 3%)       | 0% (0%, 1%)       | 1% (0%, 3%)       | 0% (0%, 3%)       | 0.98                 | 1% (0%, 3%)            | 0% (0%, 2%)       | 0.33                 |
| AUC <2.8 mmol/L                 | 0.0 (0.0, 0.2)    | 0.0 (0.0, 0.1)    | 0.0 (0.0, 0.2)    | 0.0 (0.0, 0.2)    | 0.77                 | 0.0 (0.0, 0.2)         | 0.0 (0.0, 0.1)    | 0.53                 |
| Low BG index                    | 1.3 (0.7, 2.5)    | 1.0 (0.4, 1.7)    | 1.5 (0.6, 2.3)    | 1.5 (0.6, 2.4)    | 0.85                 | 1.8 (0.9, 2.5)         | 1.3 (0.7, 2.2)    | 0.41                 |
| Episodes per 24h <sup>c</sup>   | 0.5 (0.1, 0.7)    | 0.3 (0.1, 0.6)    | 0.5 (0.2, 0.8)    | 0.4 (0.2, 0.8)    | 0.69                 | 0.6 (0.2, 0.8)         | 0.5 (0.1, 0.7)    | 0.34                 |
| <b>Glucose variability</b>      |                   |                   |                   |                   |                      |                        |                   |                      |
| CV                              | 40% (36%, 45%)    | 38% (33%, 45%)    | 38% (35%, 44%)    | 40% (35%, 44%)    | 0.24                 | 40% (35%, 44%)         | 37% (33%, 42%)    | 0.40                 |
| SD (mmol/L)                     | 3.5 (3.0, 4.4)    | 3.5 (2.7, 4.1)    | 3.3 (2.8, 3.7)    | 3.5 (3.2, 4.2)    | 0.004                | 3.3 (2.5, 3.7)         | 3.2 (2.7, 3.7)    | 0.54                 |
| MAGE (mmol/L)                   | 6.6 (5.7, 7.9)    | 6.5 (5.6, 7.9)    | 6.4 (5.7, 7.2)    | 6.9 (5.8, 8.5)    | 0.03                 | 6.4 (4.8, 7.5)         | 6.7 (5.6, 7.4)    | 0.53                 |
| Absolute rate of change         | 0.66 (0.56, 0.79) | 0.64 (0.54, 0.73) | 0.83 (0.70, 0.94) | 0.70 (0.59, 0.77) | <0.000<br>3          | 0.85 (0.67, 0.98)      | 0.64 (0.53, 0.73) | <0.000<br>1          |

a – Excludes women who became pregnant prior to the 12 week visit.

b – Includes the final CGM data for women who became pregnant prior to the 24 week visit.

c – Hypoglycaemic episode defined as CGM readings <3.5 mmol/L for at least 20 minutes. Distinct episodes must be separated by at least 30 minutes.

† P-value adjusted for baseline value and insulin modality.

**Table S12: Additional neonatal outcomes**

|                                                        | CGM                  | Control              | P-value*    |
|--------------------------------------------------------|----------------------|----------------------|-------------|
|                                                        | <b>N=83</b>          | <b>N=80</b>          |             |
| Cord Blood pH <7.0                                     | 0                    | 2                    | 0.24        |
|                                                        | N=61                 | N=61                 |             |
| Cord Blood C-peptide pmol/L<br>median (IQR)            | 695 (497-1354)       | 887 (513-1701)       | 0.37        |
| Cord C-peptide >566 pmol/L <sup>◊</sup>                | 40 (65.6%)           | 42 (68.9%)           | 0.85        |
| Cord C-peptide >2725 pmol/L <sup>†</sup>               | 6                    | 6                    | 1.0         |
|                                                        | N=100                | N=100                |             |
| Infant length of hospital stay                         |                      |                      |             |
| Total number of days for hospital admission            | 455                  | 697                  |             |
| Median (IQR)                                           | <b>3.1 (2.1-5.7)</b> | <b>4.0 (2.4-7.0)</b> | <b>0.01</b> |
| Late preterm ≥34 or <37 wks                            | 33 (33.0%)           | 32 (32.0%)           | 1.0         |
| Total number of days for hospital admission            | 198                  | 260                  |             |
| Median (IQR)                                           | 4.9 (2.3-7.2)        | 6.1 (3.0-9.7)        |             |
| Early preterm <34 wks                                  | 5 (5.0%)             | 10 (10.0%)           | 0.28        |
| Total # of days for hospital admission                 | 54                   | 218                  |             |
| Median (IQR)                                           | 11.0 (9.2-11.3)      | 19.8 (11.5-34.8)     |             |
|                                                        | N=99                 | N=98                 |             |
| Hospital re-admission following first discharge home   | 14 (14.1%)           | 8 (8.2%)             | 0.26        |
| Total number of times baby was re-admitted to hospital | 17                   | 9                    |             |

\*P-values for continuous variables are from Wilcoxon rank sum tests; p-values for dichotomous outcomes are from Fisher's exact tests. The p-value for infant length of hospital stay is from log-rank test stratified for baseline HbA1c and insulin delivery method

<sup>◊</sup> Cord c-peptide >566 pmol/L is based on >90<sup>th</sup> percentile value (>1.7 ug/L) in the HAPO study

<sup>†</sup> Cord c-peptide >2725 pmol/L is based on >90<sup>th</sup> percentile value in the CONCEPTT study



**Table S13: Neonatal anthropometric measures**

|                                                           | CGM         | Control     | P-value* |
|-----------------------------------------------------------|-------------|-------------|----------|
| <b>Anthropometric Measures</b>                            | <b>N=85</b> | <b>N=75</b> |          |
| Biceps (mm)                                               | 5.19±1.67   | 4.87±1.26   | 0.44     |
| Missing                                                   | N=17        | N=15        |          |
| Triceps (mm)                                              | 5.93±1.85   | 5.96±1.69   | 0.78     |
| Missing                                                   | N=14        | N=12        |          |
| Subscapular (mm)                                          | 5.64±1.57   | 5.96±1.81   | 0.36     |
| Missing                                                   | N=14        | N=12        |          |
| Suprailiac (Flank) (mm)                                   | 5.04±1.80   | 5.43±1.95   | 0.24     |
| Missing                                                   | N=16        | N=13        |          |
| Sum of 4 skin folds (triceps, subscapular, biceps, flank) | 21.9±5.9    | 22.1±5.6    | 0.67     |
| Missing                                                   | N=17        | N=15        |          |
| Sum of 4 skin folds >90 <sup>th</sup> percentile          | 7 (10.3%)   | 6 (10.0%)   | 1.0      |
| Sum of 3 skin folds (triceps, biceps, sub scapular)       | 16.8±4.5    | 16.7±4.0    | 0.84     |
| Missing                                                   | N=17        | N=15        |          |
| Sum of 3 skin folds >90 <sup>th</sup> percentile          | 8 (11.8%)   | 5 (8.3%)    | 0.57     |
| Head Circumference (cm)                                   | 34.3±2.1    | 34.5±1.7    | 0.76     |
| Chest circumference (cm)                                  | 34.7±3.2    | 34.6±2.5    | 0.41     |
| Missing                                                   | N=12        | N=6         |          |
| Abdominal Circumference (cm)                              | 34.2±3.1    | 34.2±2.9    | 0.70     |
| Missing                                                   | N=11        | N=7         |          |
| Left upper-arm circumference (cm)                         | 11.4±1.3    | 11.7±1.4    | 0.12     |
| Missing                                                   | N=13        | N=7         |          |
| Crown-heel length (cm)                                    | 50.0±4.1    | 50.3±3.4    | 0.83     |
| Missing                                                   | N=4         | N=2         |          |
| Crown-rump length (cm)                                    | 33.4±4.5    | 34.3±4.4    | 0.16     |
| Missing                                                   | N=12        | N=8         |          |
| Head: Abdominal circumference Ratio                       | 1.0±0.1     | 1.0±0.1     | 0.69     |
| Missing                                                   | N=11        | N=7         |          |
| Neonatal fat mass <sup>§</sup>                            | 15.2±4.6    | 15.9±4.1    | 0.44     |
| Missing                                                   | 16          | 13          |          |

Values are mean ± SD unless otherwise specified. P-values for continuous variables are from Wilcoxon rank sum tests; p-values for dichotomous outcomes are from Fisher's exact tests.

<sup>§</sup> Neonatal fat mass was calculated using the mathematical model proposed by Catalano et al., which includes birth weight, length and flank skin-fold. Fat mass = 0.39055 (birth weight) + 0.0453 (flank skin-fold) – 0.03237 (length) + 0.54657.

**Table S14: Obstetric and neonatal outcomes of pregnancy planning participants who conceived during the 24-week trial**

|                                                | CGM                  | Control              |
|------------------------------------------------|----------------------|----------------------|
| <b>Maternal outcomes</b>                       | <b>N=10</b>          | <b>N=15</b>          |
| Hypertensive disorders                         | 1                    | 5                    |
| Preeclampsia                                   | 0                    | 1                    |
| Caesarean section                              | 7                    | 11                   |
| Maternal weight gain (kg)                      |                      |                      |
| From entry to 34 weeks gestation median (IQR)  | 10.4 (7.3-13.9)      | 13.4 (9.9-16.2)      |
| From 16 to 34 weeks gestation median (IQR)     | 7.7 (7.0-8.6)        | 10.5 (7.0-12.1)      |
| <b>Neonatal outcomes</b>                       | <b>N=14</b>          | <b>N=17</b>          |
| Pregnancy Loss <20 weeks                       | 4 (28.6%)            | 2 (11.8%)            |
| Stillbirth                                     | 0                    | 0                    |
| Termination                                    | 0                    | 0                    |
| Congenital anomaly                             | 0                    | 0                    |
|                                                | <b>N=10</b>          | <b>N=15</b>          |
| Gestational age at delivery weeks median (IQR) | 37.0 (35.8-37.4)     | 37.6 (36.9-38.0)     |
| Preterm birth                                  | 5                    | 4                    |
| Early preterm <34 weeks                        | 0                    | 0                    |
| Birth weight (g) (live births) (mean±SD)       | 3544.2±582.9         | 3871.5±620.4         |
| Customised centiles median (IQR)               | 94.0 (82.6-99.6)     | 97.9 (89.3-100.0)    |
| SGA <10 <sup>th</sup> centile                  | 0                    | 0                    |
| LGA >90 <sup>th</sup> centile                  | 6                    | 11                   |
| LGA > 97.7 <sup>th</sup> centile               | 4                    | 9                    |
| ≥4000g                                         | 2                    | 7                    |
| Birth injury                                   | 0                    | 0                    |
| Shoulder dystocia                              | 0                    | 0                    |
| Neonatal hypoglycaemia                         | 7                    | 7                    |
| Hyperbilirubinaemia                            | 3                    | 3                    |
| Respiratory Distress                           | 0                    | 1                    |
| High level neonatal care (NICU)                | 7                    | 6                    |
| NICU length of stay > 24 hrs                   | 5.3 (4.2-10.0)       | 3.0 (2.8-6.3)        |
| Cord Blood pH <7.0                             | 0                    | 0                    |
| Composite fetal outcome                        | 11 (78.6%)           | 12 (70.6%)           |
|                                                | <b>n=14</b>          | <b>n=17</b>          |
| Cord Blood C-peptide pmol/L                    | 914.0 (619.0-1327.5) | 556.0 (490.0-1119.5) |
| Median (IQR)                                   | <b>n=7</b>           | <b>n=11</b>          |
| Cord C-peptide >566 pmol/L <sup>◇</sup>        | 5                    | 5                    |
| Cord C-peptide >2725 pmol/L) <sup>†</sup>      | 1                    | 1                    |
| Sum of 4 skin folds Median (IQR)               | 18.9 (17.7-26.4)     | 21.5 (19.6-23.4)     |
|                                                | <b>n=5</b>           | <b>n=11</b>          |

<sup>◇</sup> Cord c-peptide >566 pmol/L is based on >90<sup>th</sup> percentile in the HAPO study

<sup>†</sup> Cord c-peptide >2725 pmol/L is based on >90<sup>th</sup> percentile in CONCEPTT

**Table S15: Summary of the Patient Reported Outcome Measures in the Pregnancy Trial**

The group by time interaction refers to between-group differences between baseline (approximately 8-9 weeks gestation) and 34 weeks gestation

| QUESTIONNAIRE (Subscale)   |         | Baseline Mean (SD) | 34 Week Mean (SD) | Group x Time Interaction p |
|----------------------------|---------|--------------------|-------------------|----------------------------|
| <b>BGMSRQ Total</b>        | CGM     | 89.5<br>(13.2)     | 98.2<br>(12.4)    | <b>0.0431</b>              |
|                            | Control | 89.9<br>(16.1)     | 93.9<br>(14.2)    |                            |
| <b>BGMSRQ Satisfaction</b> | CGM     | 34.3<br>(6.4)      | 35.9<br>(6.3)     | NS                         |
|                            | Control | 34.9<br>(7.5)      | 36.3<br>(6.5)     |                            |
| <b>BGMSRQ Impact</b>       | CGM     | 31.8<br>(7.0)      | 36.9<br>(6.6)     | NS                         |
|                            | Control | 31.5<br>(7.8)      | 32.1<br>(7.0)     |                            |
| <b>BGMSRQ Obstruction</b>  | CGM     | 25.2<br>(3.7)      | 23.5<br>(4.4)     | NS                         |
|                            | Control | 25.8<br>(3.4)      | 25.4<br>(4.5)     |                            |
| <b>HFS Total</b>           | CGM     | 39.3<br>(21.8)     | 35.7<br>(20.4)    | NS                         |
|                            | Control | 36.6<br>(19.4)     | 33.9<br>(20.1)    |                            |
| <b>HFS Behaviour</b>       | CGM     | 16.5<br>(8.8)      | 16.4<br>(8.0)     | <b>0.0347</b>              |
|                            | Control | 15.9<br>(7.2)      | 15.4<br>(7.4)     |                            |
| <b>HFS Worry</b>           | CGM     | 23.0<br>(15.2)     | 19.3<br>(14.5)    | .078                       |
|                            | Control | 20.8<br>(14.1)     | 18.5<br>(13.9)    |                            |
| <b>PAID Total</b>          | CGM     | 22.4<br>(15.7)     | 17.2<br>(13.7)    | NS                         |
|                            | Control | 17.7<br>(14.1)     | 16.4<br>(15.1)    |                            |
| <b>SHORT FORM 12 Total</b> | CGM     | 46.6<br>(5.0)      | 41.7<br>(6.9)     | NS                         |
|                            | Control | 46.7<br>(6.1)      | 42.4<br>(6.5)     |                            |
| <b>CGM-SAT Total</b>       | CGM     | -                  | 161.2<br>(25.9)   | N/A                        |

**Table S16: Summary of the Patient Reported Outcome Measures in the Pregnancy Planning Trial**

| QUESTIONNAIRE<br>(Subscale)    |         | Baseline<br>Mean (SD) | 34 Week<br>Mean (SD) | Group x Time<br>Interaction p |
|--------------------------------|---------|-----------------------|----------------------|-------------------------------|
| <b>BGMSRQ<br/>Total</b>        | CGM     | 88.1<br>(13.7)        | 91.8<br>(18.4)       | 0.043                         |
|                                | Control | 86.8<br>(14.1)        | 91.8<br>(13.9)       |                               |
| <b>BGMSRQ<br/>Satisfaction</b> | CGM     | 33.9<br>(6.8)         | 34.5<br>(6.7)        | NS                            |
|                                | Control | 34.9<br>(6.1)         | 36.4<br>(6.3)        |                               |
| <b>BGMSRQ<br/>Impact</b>       | CGM     | 29.9<br>(7.7)         | 35.2<br>(7.4)        | 0.003                         |
|                                | Control | 29.2<br>(8.1)         | 30.1<br>(7.5)        |                               |
| <b>BGMSRQ<br/>Obstruction</b>  | CGM     | 24.9<br>(3.6)         | 21.7<br>(5.4)        | 0.003                         |
|                                | Control | 24.3<br>(35.1)        | 24.5<br>(4.8)        |                               |
| <b>HFS<br/>Total</b>           | CGM     | 39.9<br>(18.9)        | 34.4<br>(18.9)       | NS                            |
|                                | Control | 42.5<br>(21.4)        | 37.2<br>(19.0)       |                               |
| <b>HFS<br/>Behaviour</b>       | CGM     | 17.0<br>(8.3)         | 15.7<br>(7.7)        | 0.03                          |
|                                | Control | 16.6<br>(8.2)         | 16.0<br>(7.3)        |                               |
| <b>HFS<br/>Worry</b>           | CGM     | 22.9<br>(13.8)        | 18.7<br>(12.7)       | 0.039                         |
|                                | Control | 25.9<br>(15.4)        | 25.5<br>(13.1)       |                               |
| <b>PAID<br/>Total</b>          | CGM     | 24.2<br>(14.5)        | 20.0<br>(14.3)       | NS                            |
|                                | Control | 21.5<br>(14.7)        | 19.0<br>(13.8)       |                               |
| <b>SHORT FORM 12<br/>Total</b> | CGM     | 46.0<br>(5.4)         | 46.0<br>(7.1)        | NS                            |
|                                | Control | 47.1<br>(5.4)         | 46.5<br>(5.6)        |                               |
| <b>CGM-SAT<br/>Total</b>       | CGM     | -                     | 166.1<br>(26.5)      | N/A                           |

**Table S17: CGM problems and skin reactions**

|                                                                      | Pregnant Participants |            | Pregnancy planning participants |           |
|----------------------------------------------------------------------|-----------------------|------------|---------------------------------|-----------|
|                                                                      | CGM                   | Control    | CGM                             | Control   |
|                                                                      | N=103                 | N=104      | N=52                            | N=57      |
| <b>Skin changes reported during trial</b>                            | 49 (47.6%)            | 8 (7.7%)   | 23 (44.2%)                      | 5 (8.8%)  |
| Acute erythema                                                       | 30                    | 5          | 18                              | 4         |
| Acute edema                                                          | 0                     | 0          | 1                               | 1         |
| Chronic scabbing                                                     | 4                     | 1          | 3                               | 0         |
| Chronic dry skin                                                     | 8                     | 0          | 9                               | 0         |
| Chronic hypopigmentation                                             | 1                     | 0          | 1                               | 0         |
| Chronic hyperpigmentation                                            | 6                     | 0          | 5                               | 0         |
| Other, specify                                                       | 28                    | 1          | 7                               | 1         |
| If yes were any classified as severe                                 | 3                     | 0          | 1                               | 0         |
| <b>Problems encountered with device</b>                              | 83 (80.6%)            | 13 (12.5%) | 44 (84.6%)                      | 6 (10.5%) |
| Problem connecting transmitter to receiver                           | 34                    | 0          | 12                              | 0         |
| Sensor did not insert properly                                       | 25                    | 0          | 19                              | 0         |
| Too much bleeding at the area of sensor insertion                    | 29                    | 0          | 16                              | 0         |
| The sensor was pulled out accidentally                               | 20                    | 6          | 9                               | 3         |
| The sensor was removed due to discomfort                             | 18                    | 2          | 3                               | 1         |
| The sensor stopped working early                                     | 27                    | 3          | 20                              | 1         |
| Other, specify                                                       | 51                    | 5          | 22                              | 1         |
| <b>Reasons for not using device</b>                                  | 80 (77.7%)            | 16 (15.4%) | 43 (82.7%)                      | 4 (7.0%)  |
| Skin irritation/pain or discomfort                                   | 21                    | 3          | 7                               | 1         |
| Alarms too frequently                                                | 22                    | 0          | 10                              | 0         |
| Did not provide accurate readings                                    | 19                    | 1          | 11                              | 0         |
| Too difficult to operate                                             | 5                     | 0          | 3                               | 0         |
| Too busy to use it                                                   | 14                    | 0          | 12                              | 0         |
| Forgot to use it                                                     | 13                    | 0          | 3                               | 0         |
| Does not provide information that is helpful for diabetes management | 9                     | 1          | 7                               | 0         |
| Device not available                                                 | 8                     | 0          | 12                              | 0         |
| Vacation                                                             | 9                     | 0          | 11                              | 1         |
| Sensor keeps coming out                                              | 7                     | 3          | 5                               | 2         |
| Calibration issues/sensor errors                                     | 35                    | 1          | 13                              | 0         |
| Sports/water activities                                              | 1                     | 0          | 1                               | 0         |
| Adhesive issues                                                      | 4                     | 2          | 3                               | 1         |
| Ran out of sensors/supplies                                          | 21                    | 0          | 15                              | 0         |
| Needed a break                                                       | 35                    | 0          | 19                              | 0         |
| Sensor insertion issues                                              | 14                    | 1          | 13                              | 0         |
| Other, specify                                                       | 37                    | 10         | 10                              | 1         |

**Table S18: Hospital admissions in pregnant women**

|                                                      | CGM            | Control       |
|------------------------------------------------------|----------------|---------------|
|                                                      | <b>N=103</b>   | <b>N=104</b>  |
| Number of women with hospital admissions             | 28 (27.2%)     | 25 (24.0%)    |
| Number of hospital admissions <sup>§</sup>           | 37             | 30            |
| Number of hospital admissions per woman median (IQR) | 1.0 (1.0-1.25) | 1.0 (1.0)     |
| Total number of days for hospital admission          | 61             | 42            |
| Number of days for hospital admission median (IQR)   | 2.0 (1.0-2.0)  | 1.0 (0.0-2.0) |
| Reasons for admission:                               |                |               |
| Diabetic ketoacidosis                                | 2 (1.9%)       | 2 (1.9%)      |
| Severe hypoglycaemia <sup>‡</sup>                    | 2 (1.9%)       | 0             |
| Hypertension                                         | 2 (1.9%)       | 2 (1.9%)      |
| Obstetrical                                          | 15 (14.6%)     | 9 (8.7%)      |
| Other, specify                                       | 13 (12.6%)     | 16 (15.4%)    |

<sup>§</sup> These data are applicable only to participants who completed at least one study visit and do not include hospital admissions <24 hours or the delivery hospital admission

<sup>‡</sup> Severe hypoglycaemia is from randomisation to 36 weeks gestation.

**Table S19: Adverse Events (occurrences)**

|                           | Pregnant Participants |            | Pregnancy planning participants |            |
|---------------------------|-----------------------|------------|---------------------------------|------------|
|                           | CGM                   | Control    | CGM                             | Control    |
|                           | N=109                 | N=78       | N=24                            | N=47       |
| Respiratory/ENT           | 29 (26.6%)            | 22 (28.2%) | 17 (70.8%)                      | 21 (44.7%) |
| GI/Nausea/Vomiting        | 16 (14.7%)            | 15 (19.2%) | 2 (8.3%)                        | 14 (29.8%) |
| Urinary/Genital           | 7 (6.4%)              | 12 (15.4%) | 0                               | 4 (8.5%)   |
| Cardio/Vasovagal          | 4 (3.7%)              | 4 (5.1%)   | 1 (4.2%)                        | 0          |
| Headaches/Migraines       | 10 (9.2%)             | 4 (5.1%)   | 1 (4.2%)                        | 2 (4.3%)   |
| Skin                      | 17 (15.6%)            | 5 (6.4%)   | 3 (12.5%)                       | 1 (2.1%)   |
| Musculoskeletal           | 9 (8.3%)              | 6 (7.7%)   | 0                               | 2 (4.3%)   |
| Blood/Hematological       | 4 (3.7%)              | 1 (1.3%)   | 0                               | 0          |
| Neurological              | 6 (5.5%)              | 1 (1.3%)   | 0                               | 0          |
| Other                     | 3 (2.7%)              | 2 (2.6%)   | 0                               | 3 (6.4%)   |
| Obstetrical               | 3 (2.7%)              | 4 (5.1%)   | 0                               | 0          |
| DKA                       | 1 (0.9%)              | 0          | 0                               | 0          |
| Psychological/Psychiatric | 0                     | 2 (2.6%)   | 0                               | 0          |

**S19a: Serious Adverse Events (occurrences)**

|                           | Pregnant Participants |          | Pregnancy planning participants |          |
|---------------------------|-----------------------|----------|---------------------------------|----------|
|                           | CGM                   | Control  | CGM                             | Control  |
|                           | N=109                 | N=78     | N=24                            | N=47     |
| Respiratory/ENT           | 1 (0.9%)              | 1 (1.3%) | 0                               | 0        |
| GI/Nausea/Vomiting        | 1 (0.9%)              | 3 (3.8%) | 2 (8.3%)                        | 1 (2.1%) |
| Urinary/Genital           | 0                     | 1 (1.3%) | 0                               | 0        |
| Headaches/Migraines       | 1 (0.9%)              | 0        | 0                               | 0        |
| Skin                      | 1 (0.9%)              | 0        | 0                               | 0        |
| Neurological <sup>§</sup> | 1 (0.9%)              | 0        | 0                               | 0        |
| Other <sup>‡</sup>        | 2 (1.8%)              | 0        | 0                               | 0        |
| Obstetrical               | 0                     | 2 (2.6%) | 0                               | 0        |
| DKA                       | 1 (0.9%)              | 0        | 0                               | 0        |

<sup>§</sup> In pregnant participant – Foot drop

<sup>‡</sup> In pregnant participant – Invasive ductal carcinoma of right breast and cortisol deficiency.

**Figure S1: Change in HbA1c in relation to unscheduled antenatal visits**

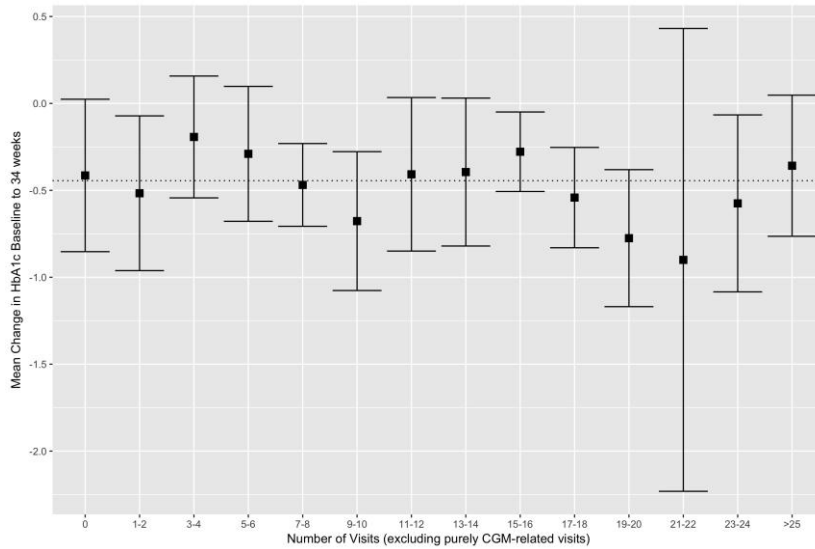

¥ This analysis of change in HbA1c by numbers of visits is an exploratory post-hoc analysis, carried out to address the possibility that the additional unscheduled visits experienced by CGM participants may have been responsible for their additional decrease in HbA1c when compared to the control participants. Unscheduled visits were classified by site investigators as only CGM-related, only diabetes-related, both CGM and diabetes-related, or other. As the number of purely CGM-related visits is almost completely confounded with treatment assignment, we excluded these CGM-only visits from the counts of unscheduled visits tallied on each participant. We formed groups based on the each participants total number of such visits (0, 1-2, 3-4, ..., 23-24, >24) and within each group computed the mean change in HbA1c from baseline to 34 weeks, along with its 95% confidence interval. The results are plotted above. The number of visits had little relationship in a one-way ANOVA with these grouped visit counts (adjusted R<sup>2</sup>=6%, adjusted R<sup>2</sup>=0%; p=0.62), or with a loess fit to the actual number of visits (R<sup>2</sup> = 2.7%, with number of equivalent parameters equal to 6). This suggests that the drop in HbA1c at the individual level was not associated with the number of visits for diabetes-alone, both diabetes and CGM, or other reasons, and therefore that additional contacts with the study in the CGM group are not likely leading to reductions in HbA1c.



**Figure S2: Neonatal birthweight percentiles according to country**

This shows the neonatal birthweight percentiles according to country. The number of neonates from Ireland (4) and the USA (1) were too small to be included in this post-hoc country specific analyses.

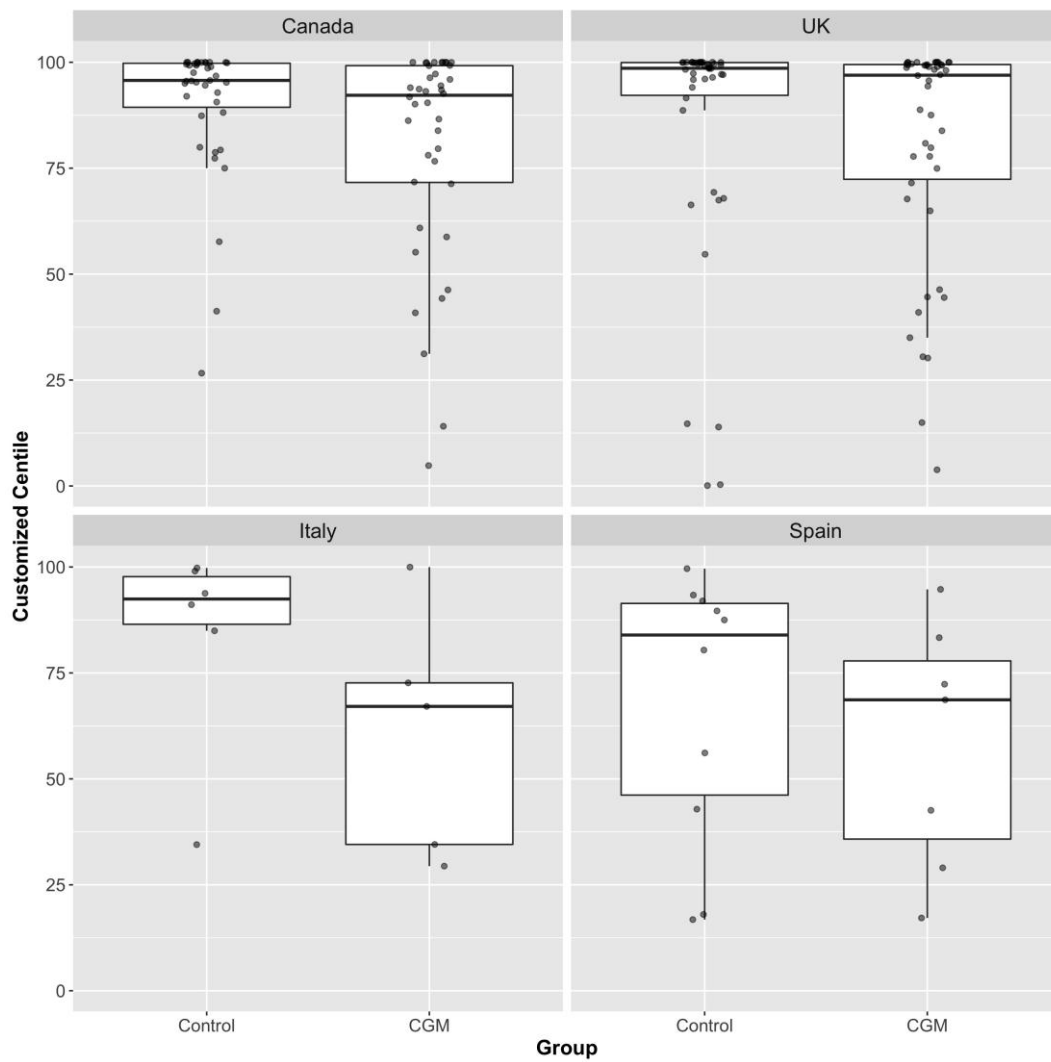

**Figure S3: Neonatal Large for Gestational Age (LGA) rates according to country**

The number of neonates from Ireland (4) and the USA (1) were too small to be included in this post-hoc country specific analyses. The estimated odds ratios were Canada 0.47, UK 0.49, Italy 0.28, Spain 0.54.

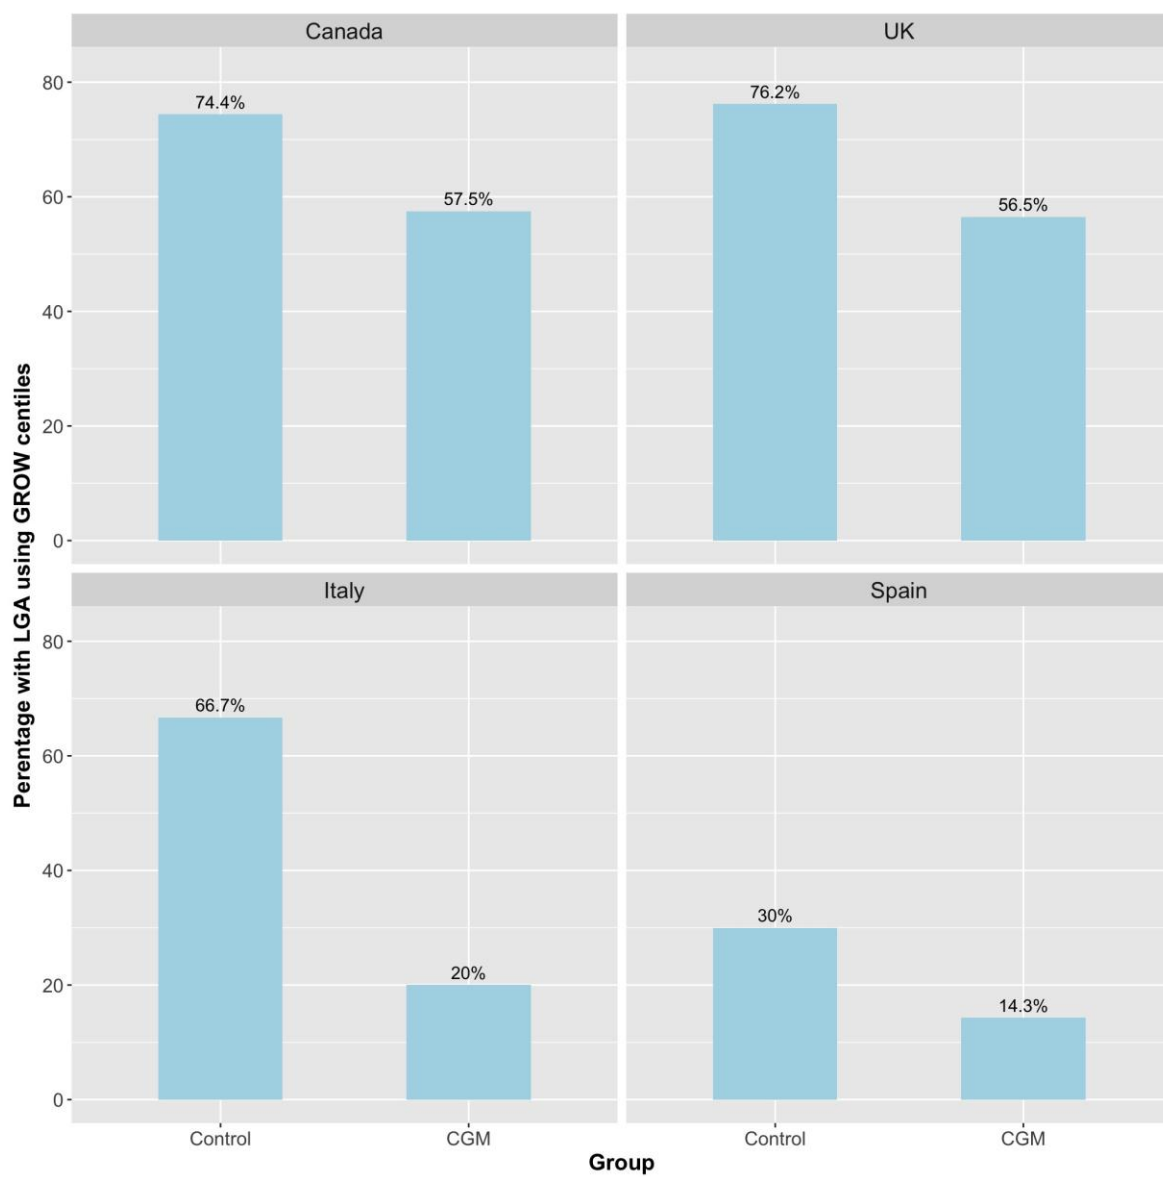

Supplement: mmc1.pdf [file mmc1.pdf]
